# Supplementary material
Source: publisher figshare collection journal article supplement (https://gsajournals.figshare.com/articles/dataset/_/12284174)
Supplement: Supplementary file 1 [file 1]

**Supplemental material for:**

**Biased gene conversion constrains adaptation in *Arabidopsis thaliana***

Tuomas Härmälä<sup>\*,1</sup> and Peter Tiffin<sup>\*</sup>

<sup>\*</sup> Department of Plant and Microbial Biology, University of Minnesota, St. Paul, MN

<sup>1</sup> [thamala@umn.edu](mailto:thamala@umn.edu)

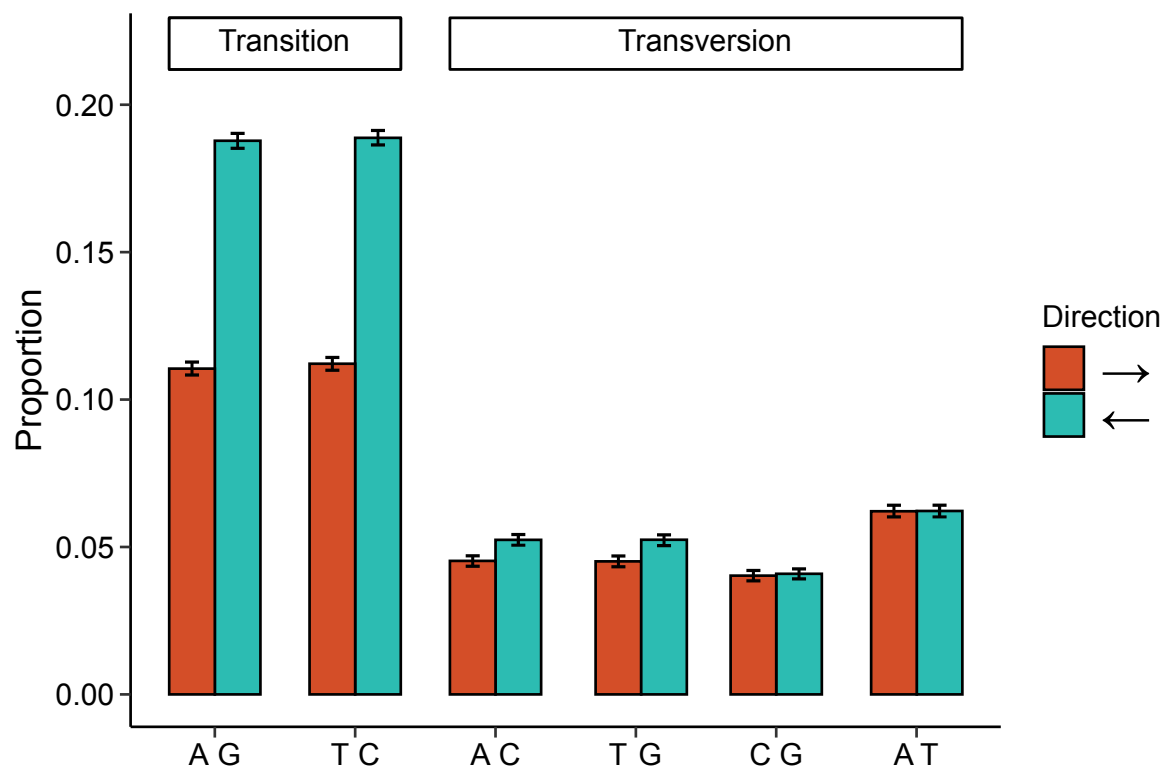

**Figure S1.** The proportion of different nucleotide changes from ancestral (*A. lyrata*, *C. rubella*, and *A. alpine*) to derived allele in *A. thaliana*. Colors show the direction of change (e.g. for “A G”, red is A → G and teal is A ← G). Error bars show 95% CIs.

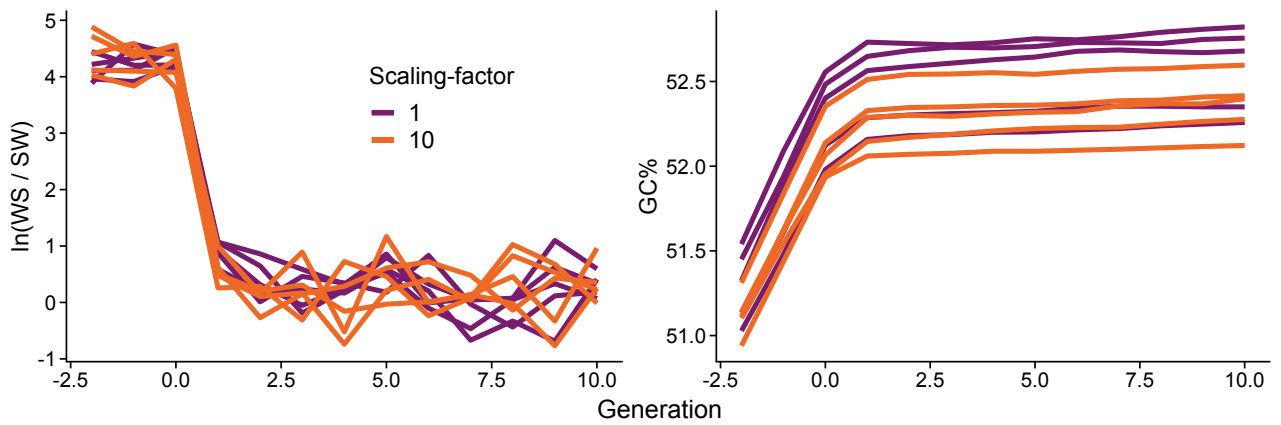

**Figure S2.** The simulated extent of gBGC with scaled and unscaled parameters. Time in number of generations ( $\times 10^4$  for scaled,  $\times 10^5$  for unscaled) are shown in horizontal axes. At time zero, population switches to 5% outcrossing. Simulations were run with moderate gene conversion rate ( $2 \times 10^{-5}$  scaled,  $2 \times 10^{-6}$  unscaled) and 10% GC over AT repair bias.

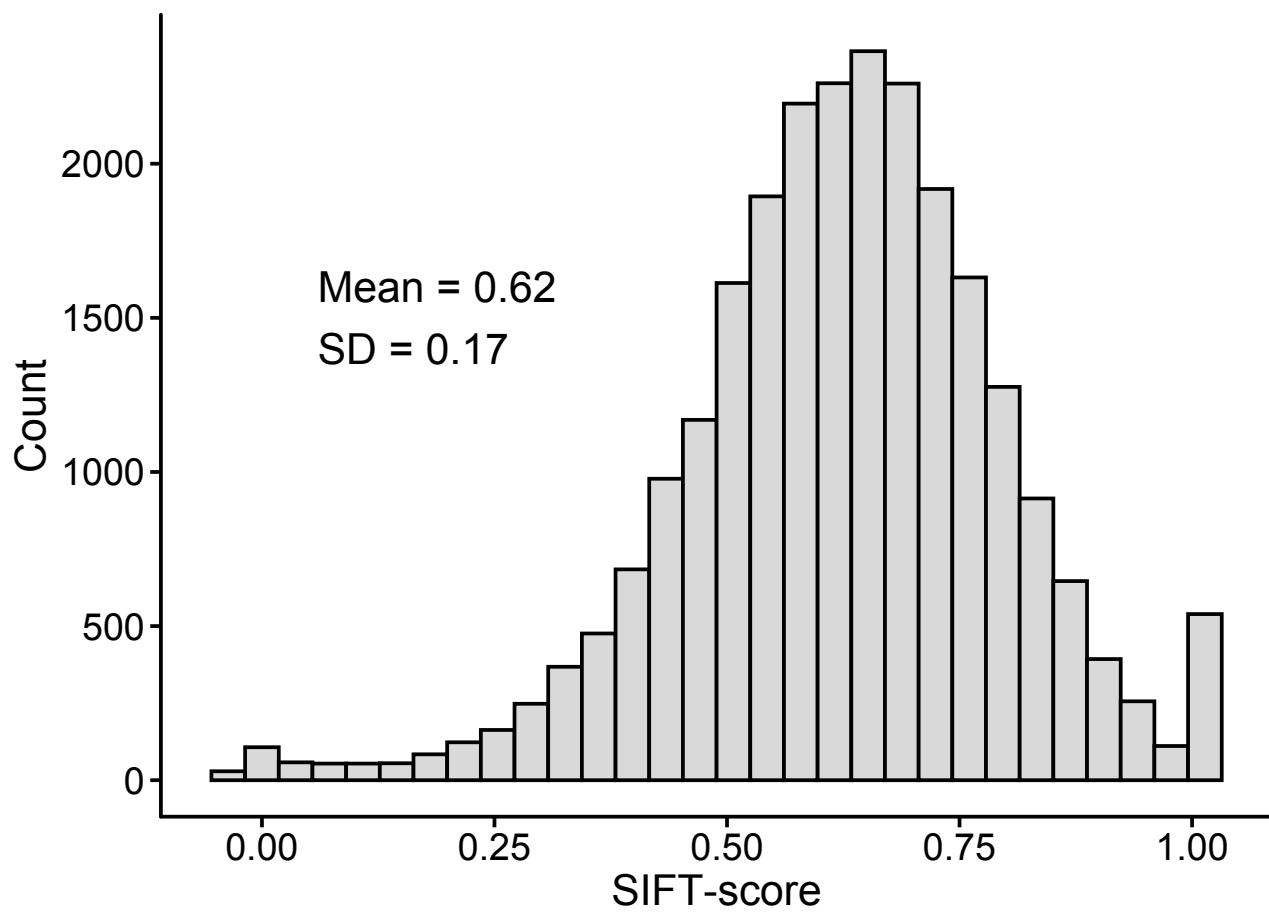

**Figure S3.** The genome-wide distribution of SIFT-scores.

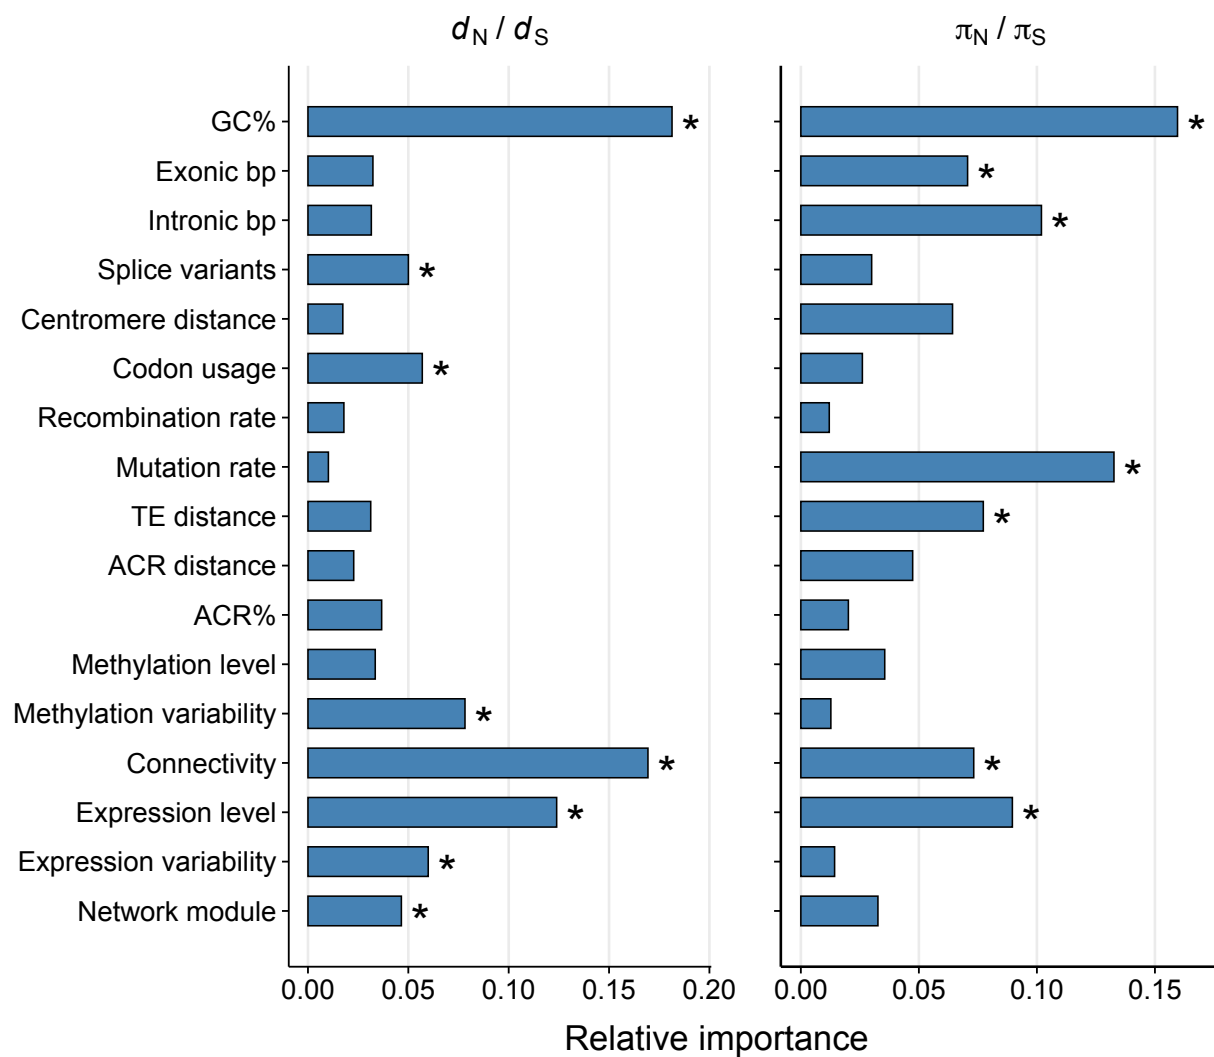

**Figure S4.** Variable importance from Extra-Trees models for  $d_N/d_S$  and  $\pi_N/\pi_S$ .

\*  $P < 0.05$  (Bonferroni corrected).

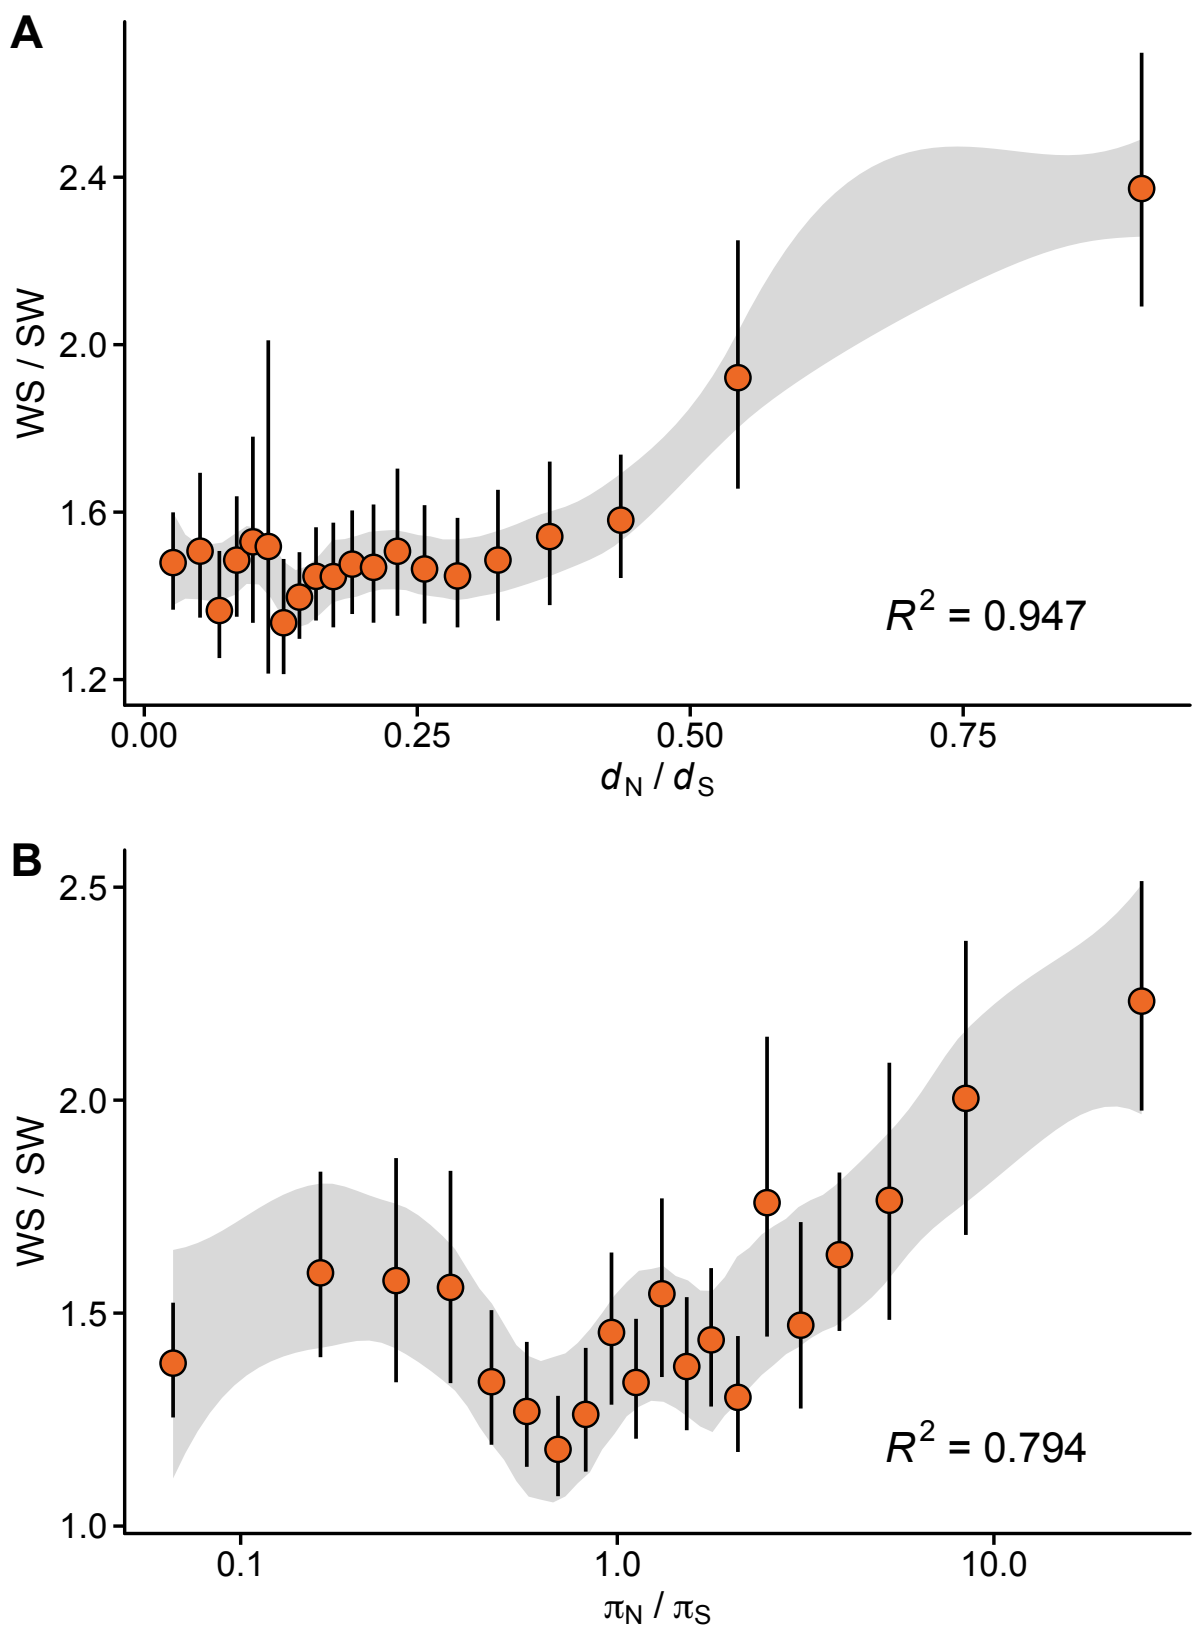

**Figure S5.** Relationship between  $WS/SW$ , a measure of gBGC, and  $d_N/d_S$  (A) and  $\pi_N/\pi_S$  (B). Data were split into 20 bins of equal size. Figure shows means (circles) and 95% CIs (error bars) estimated for each bin. Also shown are 95% CI and  $R^2$  for a loess-model (shaded area) fit on the binned data.

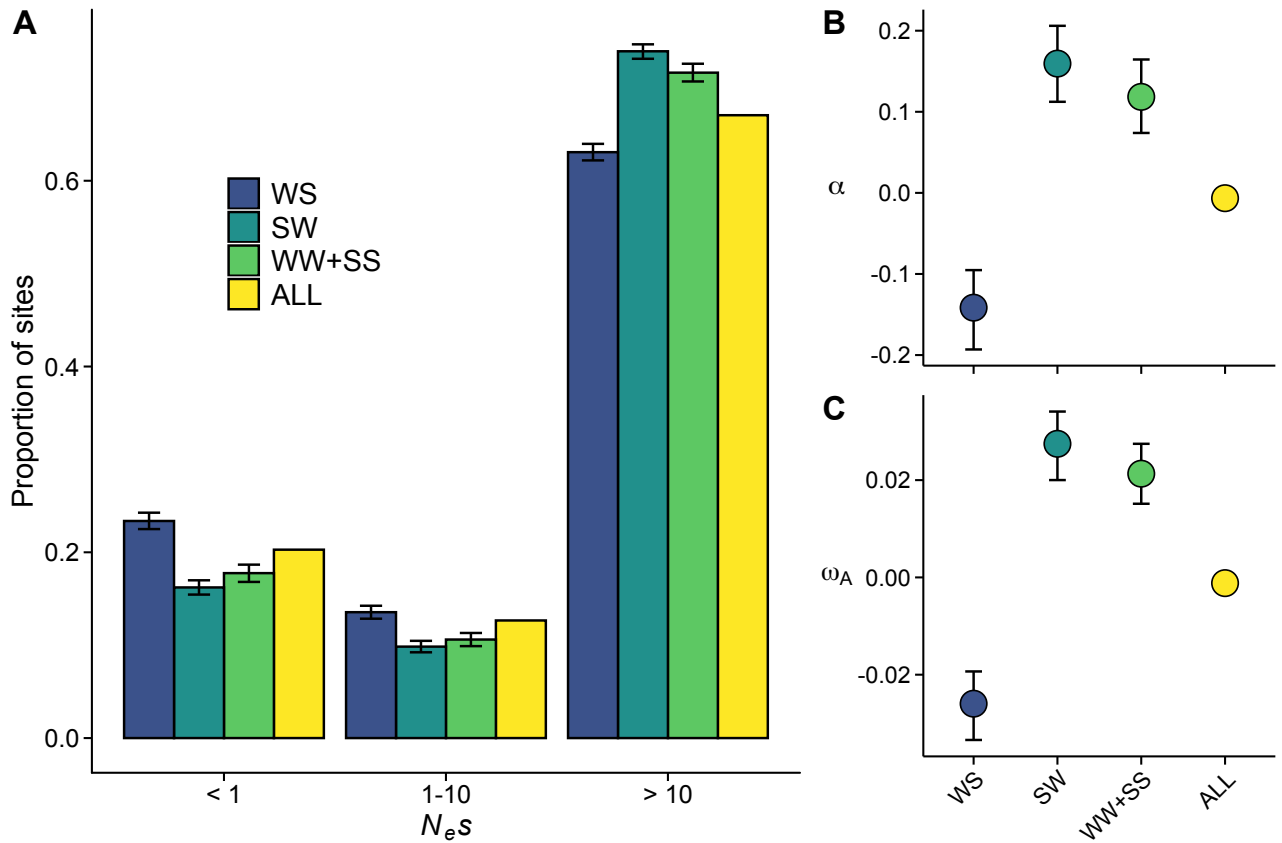

**Figure S6.** Apparent strength of negative and positive selection at different DAF-sites after removing hypermutable mGC sites. **A:** The distribution of fitness effects (DFE). Nonsynonymous sites were divided into three bins based on the strength of purifying selection ( $N_e s$ ): nearly neutral, intermediate, and highly deleterious, respectively. **B:** The proportion of sites fixed by positive selection ( $\alpha$ ). **C:** The rate of adaptive substitutions relative to the neutral mutation rate ( $\omega_A$ ). For all three figures, error bars show 95% CIs.

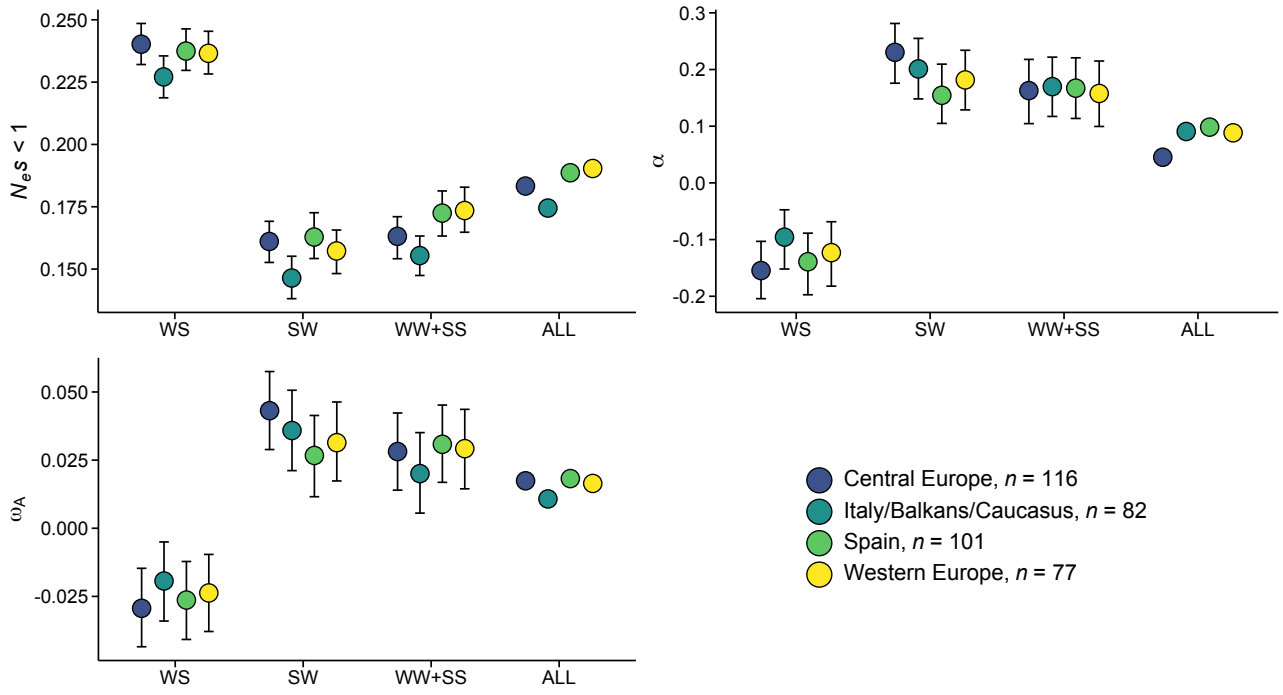

**Figure S7.** The proportion of nearly neutral mutations ( $N_e s < 1$ ), the proportion of sites fixed by positive selection ( $\alpha$ ), and the rate of adaptive substitutions relative to the neutral mutation rate ( $\omega_A$ ) for four largest admixture groups. Error bars show 95% CIs.



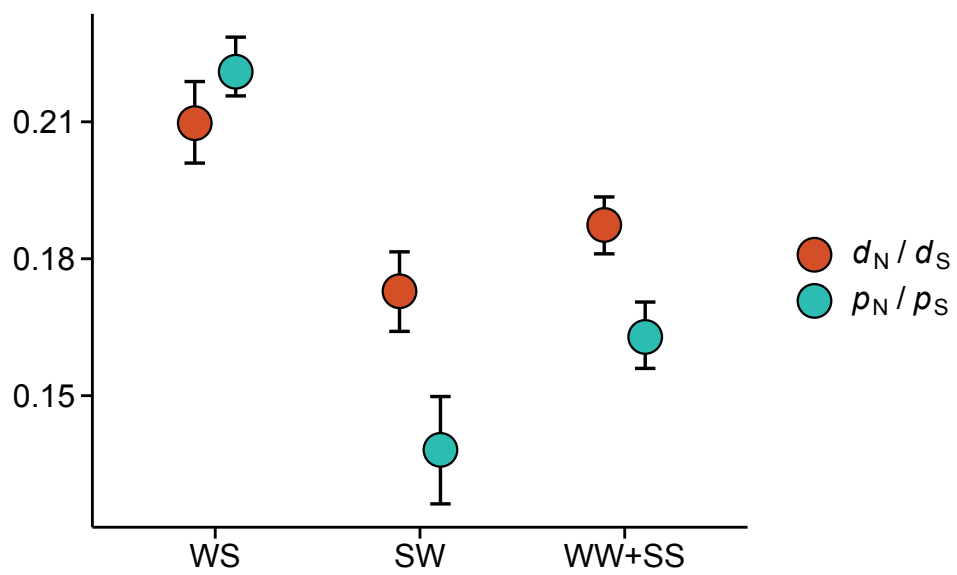

**Figure S8.**  $d_N/d_S$  and  $p_N/p_S$  at different DAF-sites for *A. thaliana*. Error bars show 95% CIs.

**Table S1.** Spearman's rank correlation between genomic features and measures of selective constraint.

| Feature                 | $d_N/d_S$ |                      | $\pi_N/\pi_S$ |                      |
|-------------------------|-----------|----------------------|---------------|----------------------|
|                         | Pairwise  | Partial <sup>1</sup> | Pairwise      | Partial <sup>1</sup> |
| GC%                     | -0.21*    | -0.15*               | -0.18*        | -0.15*               |
| Exonic bp               | ~0        | ~0                   | ~0            | ~0                   |
| Intronic bp             | -0.03*    | ~0                   | -0.04*        | ~0.04*               |
| Splice variants         | 0.07*     | 0.07*                | 0.03          | 0.03                 |
| Centromere distance     | 0.02      | 0.02                 | 0.07*         | 0.05*                |
| Codon usage             | 0.07*     | 0.03*                | 0.07*         | 0.04*                |
| Recombination rate      | -0.02     | -0.02                | -0.07*        | -0.05*               |
| Mutation rate           | ~0        | ~0                   | -0.03*        | ~0                   |
| TE distance             | 0.01      | ~0                   | 0.02          | -0.01                |
| ACR distance            | 0.11*     | ~0                   | 0.10*         | ~0                   |
| ACR%                    | -0.12*    | ~0                   | -0.10*        | 0.01                 |
| Methylation level       | -0.02*    | ~0                   | 0.01          | ~0                   |
| Methylation variability | 0.09*     | ~0                   | ~0            | ~0                   |
| Connectivity            | -0.18*    | -0.04*               | -0.10*        | ~0                   |
| Expression level        | -0.31*    | -0.18*               | -0.23*        | -0.15*               |
| Expression variability  | 0.11      | 0.06*                | 0.08          | 0.02                 |

<sup>1</sup>Partial correlation after controlling for all other features.

\* $P < 0.05$  (Bonferroni corrected).

**Table S2.** Relative importance and Spearman's rank correlation between genomic features and GC%.

| Feature                 | Relative importance | Spearman's $\rho$ |                      |
|-------------------------|---------------------|-------------------|----------------------|
|                         |                     | Pairwise          | Partial <sup>1</sup> |
| Exonic bp               | 0.04*               | 0.13*             | 0.03*                |
| Intronic bp             | 0.11*               | -0.24*            | -0.08*               |
| Splice variants         | 0.05*               | -0.18*            | -0.10*               |
| Centromere distance     | 0.04*               | 0.12*             | 0.03*                |
| Codon usage             | 0.12*               | -0.15*            | -0.07*               |
| Recombination rate      | 0.02*               | -0.12*            | -0.06*               |
| Mutation rate           | 0.01*               | -0.04*            | -0.02                |
| TE distance             | ~0                  | 0.07*             | 0.03*                |
| ACR distance            | ~0                  | -0.04*            | 0.06*                |
| ACR%                    | 0.06*               | 0.11*             | 0.06*                |
| Methylation level       | 0.13*               | -0.27*            | -0.03*               |
| Methylation variability | 0.21*               | 0.26*             | 0.04*                |
| Connectivity            | 0.03*               | 0.11*             | 0.02                 |
| Expression level        | 0.14*               | 0.20*             | 0.22*                |
| Expression variability  | 0.04*               | 0.26*             | 0.03*                |

<sup>1</sup>Partial correlation after controlling for all other features.\* $P < 0.05$  (Bonferroni corrected).
